# Supplementary material
Source: PubMed Central journal article supplement (PMC3591945)
Supplement: AEM.03152-12_zam999104167so1.pdf [file AEM.03152-12_zam999104167so1.pdf]

Table S1. Oligonucleotides used in this study.

| Primer name         | Sequence (5' --> 3') <sup>a</sup>                            | Objective                     |
|---------------------|--------------------------------------------------------------|-------------------------------|
| Forward primer A    | CSGCCGAYGTCGTGATYATYGGTG                                     | Degenerate PCR and sequencing |
| Reverse primer B    | GGCARATCGGCATRCARTTRTTRTTN<br>CC                             | Degenerate PCR and sequencing |
| AD1                 | NTCGASTWTSGWGTT                                              | TAIL-PCR                      |
| AD2                 | NGTCGASWGANAWGAA                                             | TAIL-PCR                      |
| AD3                 | WGTGNAGWANCANAGA                                             | TAIL-PCR                      |
| 621H-adh-pro(+)     | <u>GGGGTACCTTCTGGCGGTACGGAGT</u><br>C <sup>b</sup>           | pSHO8                         |
| 621H-adh-pro(-)     | <u>CCGCTCGAGATTAACCAGAAGTCAT</u><br>GATCCAAC <sup>b</sup>    | pSHO8                         |
| fdhS-5-Eco(+)       | <u>GAATTC</u> CAAACAAAAATAGTC <sup>b</sup>                   | pSHO12                        |
| fdhL-3-PstBam(-)    | <u>GGATCCTGCAGCGTGGCGTTGAAAC</u><br>ACTG <sup>b</sup>        | pSHO12                        |
| fdhS-370-ATG-Xho(+) | <u>CTCGAGGAGAAGGTAAATGGAAAAA</u><br>ATAGCTGATTC <sup>b</sup> | pSHO13                        |
| delta-fdhC(+)       | gaaccaacacctgcttcagcgCTGATCAGCC<br>GTCGCAAAAAG <sup>c</sup>  | pSHO16                        |
| delta-fdhC(-)       | CTTTTTGCGACGGCTGATCAGcgctga<br>agcaggtgttggttc <sup>c</sup>  | pSHO16                        |

<sup>a</sup>, N = A, C, G, or T; R = A or G; Y = C or T.

<sup>b</sup>, The engineered endonuclease recognition site is underlined.

<sup>c</sup>, The 3' and 5' regions of *fdhC* are shown in lower and upper cases, respectively.
