# Supplementary material
Source: PubMed Central journal article supplement (PMC3591945)
Supplement: AEM.03152-12_zam999104167so2.pdf [file AEM.03152-12_zam999104167so2.pdf]

10 20 30 40 50 60 70 80 90  
attccaacaacaaaaatagctcatttctgttattcgtgaaaatgttgatgaagaggcacacgcatatcaaattatgtcttcaaggagaagggc

100 110 120 130 140 150 160 170 180  
cattggaaaaaatagctgattccggccctgttcaaatctttctttcgcgtagaaaagcttctggctttttccgggtgccagcctaacagctcg  
M E K I A D S G P V Q I F L S R R K L L A F S G A S L T V A

### FdhS (Subunit III)

190 200 210 220 230 240 250 260 270  
cagcaattggagcaccatcgaaaggatctactcaggacgttgtggcatcaaactcgcatagcatttcggattttatgcagctttccgctt  
A I G A P S K G S T Q D V V A S N R D S I S D F M Q L S A F

280 290 300 310 320 330 340 350 360  
ttgccaccgggtcacaacaaatctggatctcaatatcggatcagcacttctgttggcatttgaagctcagaagcatgattttctactcaaa  
A T G H K N L D L N I G S A L L L A F E A Q K H D F S T Q I

370 380 390 400 410 420 430 440 450  
taaaggctcttcgcaacatattactaaaaataattatcaggatgtcgaagcactggatgcagccatgaaagatgacccccctgcattcca  
K A L R E H I T K N N Y Q D V E A L D A A M K D D P L H P T

460 470 480 490 500 510 520 530 540  
cgctcatccagattatccgggctgttattcagggtgtcatcgaagatgaaacaaacgctaaagtttacgctttcgaacaaagcactcatgt  
L I Q I I R A W Y S G V I E D E T N A K V Y A F E K A L M Y

550 560 570 580 590 600 610 620 630  
atcagccgctcccgcatgtcgtggtcattccgacatgtctcataacgggccaattactgggtctcggaaaccgcatccgtcgatgtca  
Q P S R D V V V I P T Y A H N G P N Y W V S E P A S V D V M

640 650 660 670 680 690 700 710 720  
tgccggcatttttaaggacttttattccggtgattatgcgatattttcgcctctgtccgccaacagccatgacaaccggtctgtctctcgcag  
P A F \* M R Y F R P L S A T A M T T V L L L A G

### FdhC (Subunit II)

730 740 750 760 770 780 790 800 810  
ggacgaacgtacggcgcaaacggacagaaccaaacacctgcttcagcgcacgcctccatcagccggtgattatctggcaattgccc  
T N V R A Q P T E P T P A S A H R P S I S R G H Y L A I A A

820 830 840 850 860 870 880 890 900  
ccgattgtgcccctgcataccaatggcggtgacgggtcaatttcttctgctggtgttatgccatttcttcccaatggggaatatctatt  
D C A A C H T N G R D G Q F L A G G Y A I S S P M G N I Y S

910 920 930 940 950 960 970 980 990  
caaccaatattacgcccgtcgaagacgcacggatcggaactatacactggagcagttttctaaggctctccggcagcgtatttcgcccg  
T N I T P S K T H G I G N Y T L E Q F S K A L R H G I R A D

1000 1010 1020 1030 1040 1050 1060 1070 1080  
atggcggcaactgtatcccgcctatgccttatgacgcttacaatcgtctgacggatgaagacgtcaaactcgtctacgcttacatcatga  
G A Q L Y P A M P Y D A Y N R L T D E D V K S L Y A Y I M T

1090 1100 1110 1120 1130 1140 1150 1160 1170  
ctgaagtaaaaccgtagatgcaccttctccaagacgcaactccccttccggttttcaatccgtgcatcactcgggtatttggaaaattg  
E V K P V D A P S P K T Q L P F P F S I R A S L G I W K I A

1180 1190 1200 1210 1220 1230 1240 1250 1260  
cggcaagaatcgaaggcaaacctatgtctttgatcatacccacaatgacgactggaatcgtggctcactcgggtgatgaactcggccc  
A R I E G K P Y V F D H T H N D D W N R G R Y L V D E L A H

1270 1280 1290 1300 1310 1320 1330 1340 1350  
 attgtggagagtgtcacacaccgcgtaacttttcttctagcgcccaatcagtcgcttatcttgctgggacataggatcatggcgtg  
**C G E C H** T P R N F L L A P N Q S A Y L A G A D I G S W R A

1360 1370 1380 1390 1400 1410 1420 1430 1440  
 caccaaatattaccaatgcccctcaaagcggatttggcagttggcggatcaggatctcttccaatatctgaaaactggaaaaaccgcac  
 P N I T N A P Q S G I G S W S D Q D L F Q Y L K T G K T A H

1450 1460 1470 1480 1490 1500 1510 1520 1530  
 atgctcgtgcagcaggaccaatggcagaagcaatcgagcatagcctacaatatcttccggatgccgatatttctgccatagttacatatac  
 A R A A G P M A E A I E H S L Q Y L P D A D I S A I V T Y L

1540 1550 1560 1570 1580 1590 1600 1610 1620  
 ttcgttcggttccggcaaaagcagaagcggtaaaacagtcgctaattttgagcatgccggccgccatccagttacagtggtgctaaccg  
 R S V P A K A E S G Q T V A N F E H A G R P S S Y S V A N A

1630 1640 1650 1660 1670 1680 1690 1700 1710  
 ctaactcccgctcgcagcaatagtagtactctgacaaaaacaaccgatgggtgctgcactctacgaggctgtgtgcccagttgccatcaatctg  
 N S R R S N S T L T K T T D G A A L Y E A V **C A S C H** Q S D

1720 1730 1740 1750 1760 1770 1780 1790 1800  
 acggtaaaggttcaaagcggttattatccttccctcgtaggaatacagcagccgggcaactcaatccaatgatctgatcgccagta  
 G K G S K D G Y Y P S L V G N T T T G Q L N P N D L I A S I

1810 1820 1830 1840 1850 1860 1870 1880 1890  
 ttctttacggtgtggaccgcacacggataaccacgaaatcctgatgccggcttttggccagactctctctgtacagccctgacagatg  
 L Y G V D R T T D N H E I L M P A F G P D S L V Q P L T D E

1900 1910 1920 1930 1940 1950 1960 1970 1980  
 agcagatgccacaatcgcggactacgttctaagccactttggcaatgccaggccacagtcctcggcagatggcgtcaaacaggtgcccgg  
 Q I A T I A D Y V L S H F G N A Q A T V S A D A V K Q V R A

1990 2000 2010 2020 2030 2040 2050 2060 2070  
 cggcggaagcaggttccctcctcgcgaagctcgcagtcggggcgtgatgctgcttctcggaaactggggatcctgggagccattctgg  
 G G K Q V P L A K L A S P G V M L L L G T G G I L G A I L V

2080 2090 2100 2110 2120 2130 2140 2150 2160  
 tggtagccggcctctggtggctgatcagccgctcgaataagcgttccgcttaataagattca**agg**gtcaaaatcatgtctaatgaaacgc  
 V A G L W W L I S R R K K R S A \* M S N E T L

**FdhL (Subunit I)**

2170 2180 2190 2200 2210 2220 2230 2240 2250  
 tttcggctgatgtcgtcatcattggagcaggaatctgcggtccctgctcgcccaaaactcgtccgcaacggactttctgtgctgctcc  
S A D V V I I **G A G I C G** S L L A H K L V R N G L S V L L L

2260 2270 2280 2290 2300 2310 2320 2330 2340  
 tggatgcaggtccccgcccggaccgctcccagatcgtagaaaactggcggaaacatgccgctgacaacaagtcccagtagcattatgcaa  
 D A G P R R D R S Q I V E N W R N M P P D N K S Q Y D Y A T

2350 2360 2370 2380 2390 2400 2410 2420 2430  
 caccttaccagcgtaccctgggcccgcataccaactacttcccagacaataactacctgattgtcaaagcccggaccggacggctt  
 P Y P S V P W A P H T N Y F P D N N Y L I V K G P D R T A Y

2440      2450      2460      2470      2480      2490      2500      2510      2520  
 acaagcaaggaatcatcaaaggcgtcgggggtacaacctggcactggcggttcaagctggcgggtacctgcccaacgatttcaagctgc  
 K Q G I I K G V G G T T W H W A A S S W R Y L P N D F K L H

2530      2540      2550      2560      2570      2580      2590      2600      2610  
 attccacatatggcgtgggcccgcgattacgccatgagctacgacgaacttgagccttactattacgaggccgagtgcgaaatggcgctga  
 S T Y G V G R D Y A M S Y D E L E P Y Y Y E A E C E M G V M

2620      2630      2640      2650      2660      2670      2680      2690      2700  
 tgggaccaaacggcgaagagattacaccgtctgcgcctcgccaaaatccatggccgatgacctccatgccttacgggatatggagaccgca  
 G P N G E E I T P S A P R Q N P W P M T S M P Y G Y G D R T

2710      2720      2730      2740      2750      2760      2770      2780      2790  
 ctttcacggagatcgtcagcaagctcgggtttctcaaacactcctgttccgcaggcacggaacagtcgtccttatgatggccgaccacaat  
 F T E I V S K L G F S N T P V P Q A R N S R P Y D G R P Q C

2800      2810      2820      2830      2840      2850      2860      2870      2880  
 gctgtggcaacaacaactgcatgccaatctgcccgattggcgcgatgtacaatggcgtatatacgcggaataaaagcgaaaagctggcg  
 C G N N N C M P I C P I G A M Y N G V Y A A I K A E K L G A

2890      2900      2910      2920      2930      2940      2950      2960      2970  
 caaaaattattcccgaatgctgctcctatgcatggaacggatgcaaaaaaccggatcacagcgattagcttctatgatcccgacaagc  
 K I I P N A V V Y A M E T D A K N R I T A I S F Y D P D K Q

2980      2990      3000      3010      3020      3030      3040      3050      3060  
 agtcccacgcgctggttgcaaaaacatttgtgatcgccgcaaacgggatcgaaacaccgaaactgctgcttctggcggcaaatgatcgaa  
 S H R V V A K T F V I A A N G I E T P K L L L L A A N D R N

3070      3080      3090      3100      3110      3120      3130      3140      3150  
 accctcatgggattgccaactcatcagacctgttggccggaacatgatggaccatccgggcatcggcatgagcttccagctcggggagc  
 P H G I A N S S D L V G R N M M D H P G I G M S F Q S A E P

3160      3170      3180      3190      3200      3210      3220      3230      3240  
 ccatctgggctggtggaggctcagtcagatgagttccatcaccaacttccgctgatggcgatttccgctcggagatgctgccacgcaga  
 I W A G G G S V Q M S S I T N F R D G D F R S E Y A A T Q I

3250      3260      3270      3280      3290      3300      3310      3320      3330  
 tcggctacaacaatacggcccagaactcacgcgcccgcgatgaaagctctgtccatgggggtggttggcaagaagctggatgaagaaatcc  
 G Y N N T A Q N S R A G M K A L S M G L V G K K L D E E I R

3340      3350      3360      3370      3380      3390      3400      3410      3420  
 gccgtcgtacggcgcgatggtgtggacatttatgccaaccatgaagtcctccggaccccaacaaccgtcttgttctctccaagactata  
 R R T A H G V D I Y A N H E V L P D P N N R L V L S K D Y K

3430      3440      3450      3460      3470      3480      3490      3500      3510  
 aggatgcgctcgggtattccacatcctgaagtcacctacgatgttggggagtatggtcgggaagtcagctgccatctcaagacagcgcctga  
 D A L G I P H P E V T Y D V G E Y V R K S A A I S R Q R L M

3520      3530      3540      3550      3560      3570      3580      3590      3600  
 tggatcgcgcaaacgcatggcggtacggaatcgagatgactccgtattttacgccaacaaccacatcaccggtggcactatcatgg  
 D I A K A M G G T E I E M T P Y F T P N N H I T G G T I M G

```

3610      3620      3630      3640      3650      3660      3670      3680      3690
gccatgatccacgggattcagtggtcgataaatggctccggacccatgatcattccaatctgttccttgcaacaggcgccaccatggcag
H D P R D S V V D K W L R T H D H S N L F L A T G A T M A A

3700      3710      3720      3730      3740      3750      3760      3770      3780
cgtccggtacgggtcaattcaacgtaacaatggccgactgtcattacgcgcggcagatgccattctcaatgacctgaaacaggggtaag
S G T V N S T L T M A A L S L R A A D A I L N D L K Q G *

3790      3800      3810      3820      3830      3840      3850      3860      3870
tcttttgaacacagtgtttcaacgccacgctattggcgcttttctaagtattttcatcgcatcagcaagtctgactggtctcgcatcagc
M F Q R H A I G A F L S I F I A S A S L T G L A S A

Hypothetical protein

3880      3890      3900      3910      3920      3930      3940      3950      3960
aaaggatttgaccgtgaatctggaacatccaatactctcattgaccaagccaagaaactggcgactgccagtcataaccgcgctcgccat
K D L T V N L E T S N T L I D Q A K K L A T A S H N R V A I

3970      3980      3990      4000      4010      4020      4030      4040      4050
cgctattgtcgatgcagggggaaatcttgtatcttttcaaaaaatggatggcaccacaacttgggagcattgagctggcgatccgtaaggc
A I V D A G G N L V S F Q K M D G T Q L G S I E L A I R K A

4060      4070      4080      4090      4100      4110      4120      4130      4140
caagactgctctttccttcgcccccggactgctgacatggaacatgccctcaatagtggaattacatgatcagcagcgtccccaatgc
K T A L S F A R P T A D M E H A L N S G N Y M I S T L P N A

4150      4160      4170      4180      4190      4200
tctgcccgagggtgaggatacccgatcatggtgaacaatgaacttgggtcgccatcataaggacg
L P A G G G Y P I M V N N E L V V G H H K D

```

Kawai et al.

Fig. S1. Nucleotide and predicted amino acid sequences of *fdhSCL* are shown. Part of the gene for a hypothetical protein downstream of *fdhL* is also shown. Possible ribosome-binding sites located prior to the initiation codon of each gene are shown in bold face. Consensus sequences for heme C binding and FAD binding are shown in bold face. Black arrowheads indicate putative cleavage sites for the precursor forms of subunits II and III, predicted by the SOSUI signal program. The amino acid sequence of subunit I determined by the peptide sequencer is underlined. The nucleotide sequence and predicted amino acid sequences for *fdhSCL* were deposited to DDBJ with the accession number AB728565.

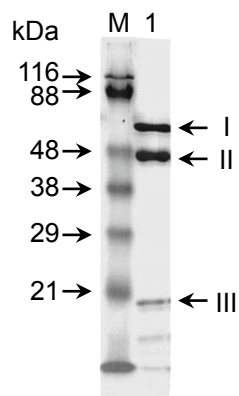

Kawai et al.

Fig. S2. Coomassie staining of the purified FDH complex separated by SDS-PAGE. Lane M, Molecular mass standard and 10  $\mu\text{g}$  of the purified FDH complex were applied on lanes 1 and M, respectively.
